# Supplementary material
Source: ML conference proceedings conference paper supplement (https://openaccess.thecvf.com/content/ICCV2023/html/Huang_Counting_Crowds_in_ICCV_2023_paper.html)
Supplement: Supplementary file 1 [file Huang_Counting_Crowds_in_ICCV_2023_supplemental.pdf]

# Supplementary Material of Counting Crowds in Bad Weather

Zhi-Kai Huang<sup>1\*</sup> Wei-Ting Chen<sup>1,2\*</sup> Yuan-Chun Chiang<sup>1</sup> Sy-Yen Kuo<sup>1</sup> Ming-Hsuan Yang<sup>3,4,5</sup>

<sup>1</sup>National Taiwan University <sup>2</sup>Stanford University <sup>3</sup>UC Merced <sup>4</sup>Google Research <sup>5</sup>Yonsei University

<https://awccnet.github.io/>

## 1. More Experimental Results

### 1.1. Quantitative Evaluation

We evaluate our method with more methods including MCNN [19], CSR-Net [5], SA-Net [1], and NoisyCC [14] on the ShanghaiTech [20], UCF-QNRF [4], JHU-Crowd++ [13], and NWPU-CROWD [17] datasets. The results are demonstrated in Table 1. The proposed AWCC-Net can achieve the best performance in UCF-QNRF and JHU-Crowd++ while conducting comparable performance in the ShanghaiTechA and NWPU-CROWD datasets. Moreover, we present the density maps under different adverse weather and clear scene predicted by the AWCC-Net and other algorithms in Figure 1. The results show that the AWCC-Net can predict the more accurate density distribution and counts of crowds under bad weather and clear scenes.

## 2. Implementation Details

In Table 1 of the regular paper, we compare our methods with several baselines. The results of 'BL-U', 'BL-UF', 'GL', 'GL-U' and 'GL-UF' are retrained based on their original setting and official implementation since they do not provide pre-trained weights on the JHU-Crowd++ dataset. The results of other methods are directly reported from their original papers or the paper of the JHU-Crowd++ dataset [13].

---

\* indicates equal contribution.

| Dataset<br>Method   | ShanghaiTechA |             | UCF-QNRF    |              | JHU-Crowd++ |              | NWPU-CROWD  |              |
|---------------------|---------------|-------------|-------------|--------------|-------------|--------------|-------------|--------------|
|                     | MAE           | MSE         | MAE         | MSE          | MAE         | MSE          | MAE         | MSE          |
| MCNN [19]           | 110.2         | 173.2       | 277.0       | 426.0        | 188.9       | 483.4        | 232.5       | 714.6        |
| CSRNet [5]          | 68.2          | 115.0       | -           | -            | 85.9        | 309.2        | 121.3       | 387.8        |
| SANet [1]           | 67.0          | 104.5       | -           | -            | 91.1        | 320.4        | 190.6       | 491.4        |
| SFCN [18]           | 64.8          | 107.5       | 102.0       | 171.4        | 77.5        | 297.6        | 105.7       | 424.1        |
| BL [9]              | 62.8          | 101.8       | 88.7        | 154.8        | 75.0        | 299.9        | 105.4       | 454.2        |
| LSCCNN [11]         | 66.5          | 101.8       | 120.5       | 218.2        | 112.7       | 454.4        | -           | -            |
| CG-DRCN-VGG16 [13]  | 64.0          | 98.4        | 112.2       | 176.3        | 82.3        | 328.0        | -           | -            |
| CG-DRCN-Res101 [13] | 60.2          | 94.0        | 95.5        | 164.3        | 71.0        | 278.6        | -           | -            |
| DM-Count [16]       | 59.7          | 95.7        | 85.6        | 148.3        | -           | -            | 88.4        | 388.6        |
| NoisyCC [14]        | 61.9          | 99.6        | 85.8        | 150.6        | -           | -            | 96.9        | 534.2        |
| UOT [10]            | 58.1          | 95.9        | 83.3        | 142.3        | 60.5        | 252.7        | 87.8        | 387.5        |
| S3 [7]              | 57.0          | 96.0        | 80.6        | 139.8        | 59.4        | 244.0        | 83.5        | 346.9        |
| GL [15]             | 61.3          | 95.4        | 84.3        | 147.5        | 59.9        | 259.5        | 79.3        | 346.1        |
| ChfL [12]           | 57.5          | 94.3        | 80.3        | 137.6        | 57.0        | 235.7        | 76.8        | 343.0        |
| CLTR [6]            | 56.9          | 95.2        | 85.8        | 141.3        | 59.5        | 240.6        | <b>74.3</b> | 333.8        |
| MAN [8]             | 56.8          | <u>90.3</u> | <u>77.3</u> | <u>131.5</u> | <u>53.4</u> | <u>209.9</u> | 76.5        | <b>323.0</b> |
| GauNet [3]          | <b>54.8</b>   | <b>89.1</b> | 81.6        | 153.7        | 58.2        | 245.1        | -           | -            |
| <b>AWCC-Net</b>     | <u>56.2</u>   | 91.3        | <b>76.4</b> | <b>130.5</b> | <b>52.3</b> | <b>207.2</b> | <u>74.4</u> | <u>329.1</u> |

Table 1. Quantitative comparison on the ShanghaiTech A [20], UCF-QNRF [4], JHU-Crowd++ [13], and NWPU-CROWD [17] datasets with existing methods.

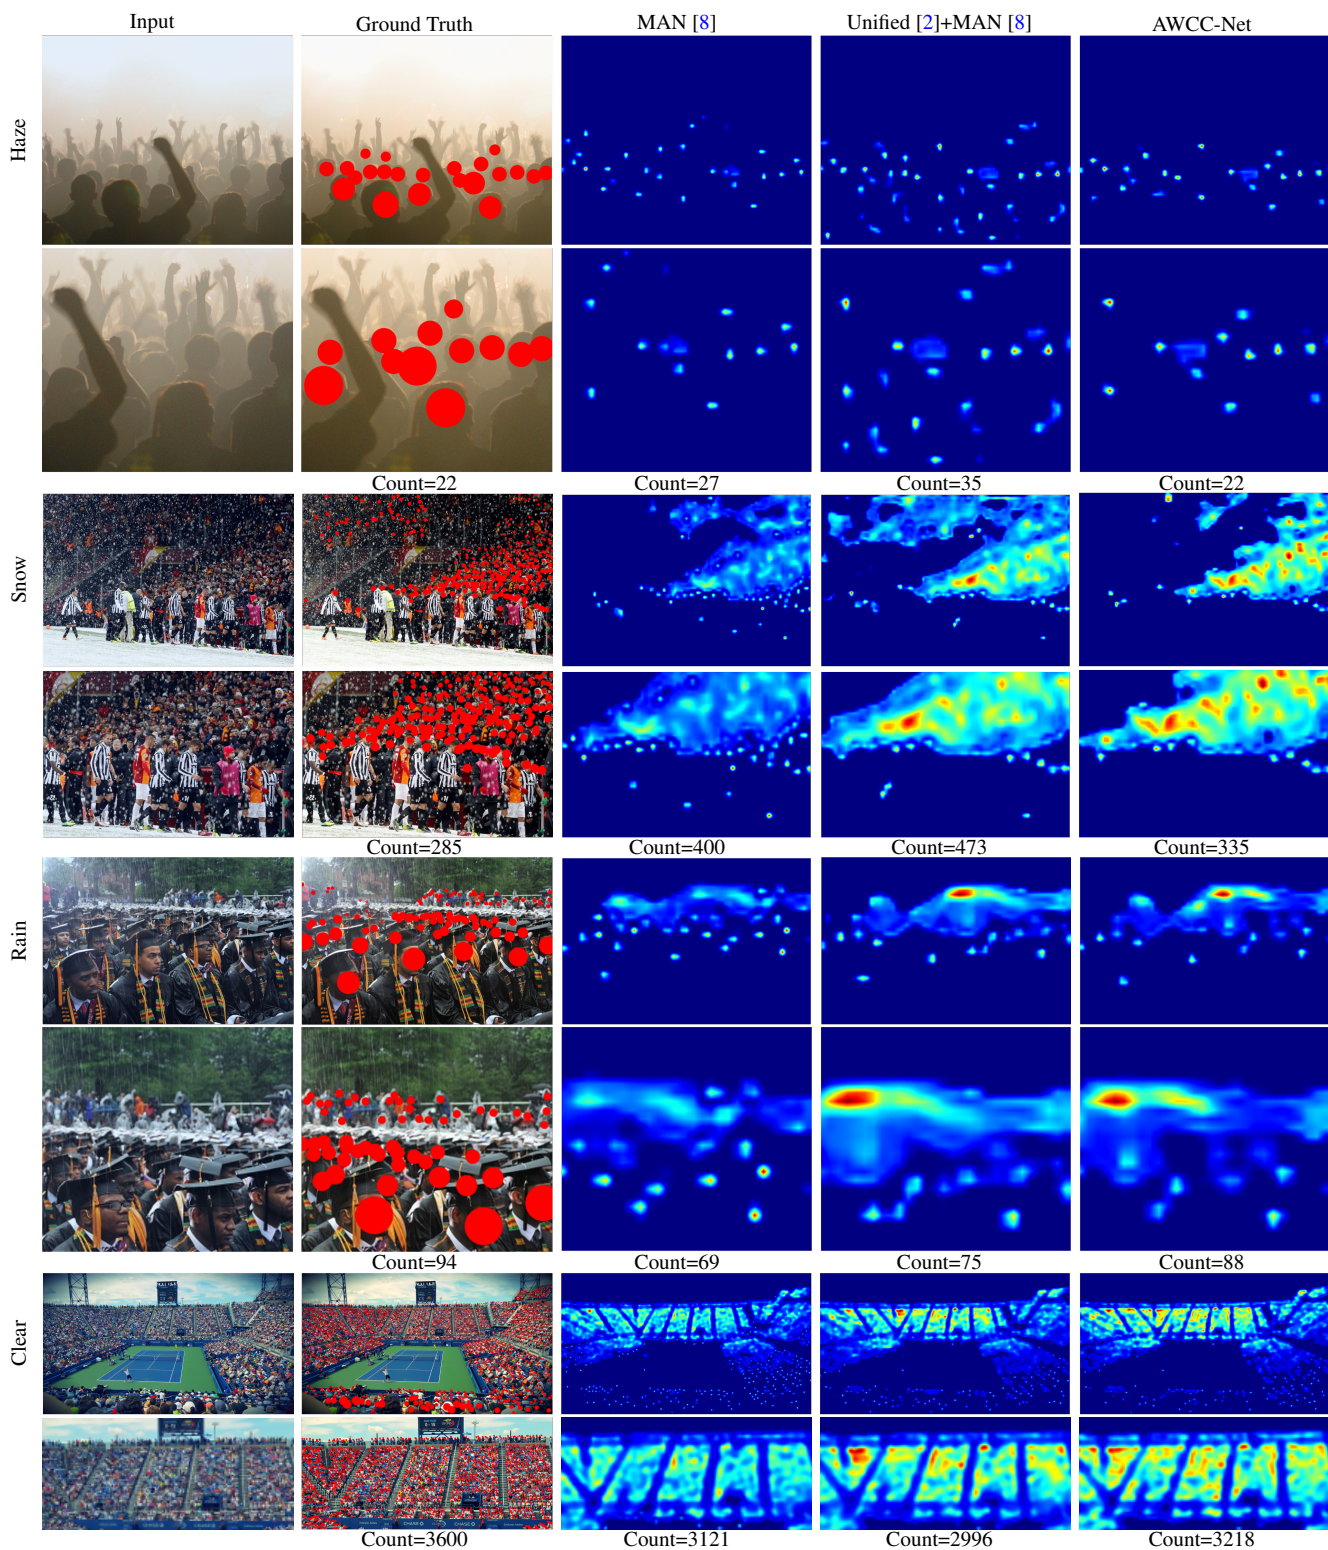

Figure 1. Comparison of density maps of the proposed method and other methods in the adverse weather (i.e., haze, snow, rain) and clear scene. The proposed method can compute more accurate density maps compared to the results estimated by other strategies.

## References

- [1] Xinkun Cao, Zhipeng Wang, Yanyun Zhao, and Fei Su. Scale aggregation network for accurate and efficient crowd counting. In *ECCV*, 2018. 1, 2
- [2] Wei-Ting Chen, Zhi-Kai Huang, Cheng-Che Tsai, Hao-Hsiang Yang, Jian-Jiun Ding, and Sy-Yen Kuo. Learning multiple adverse weather removal via two-stage knowledge learning and multi-contrastive regularization: Toward a unified model. In *CVPR*, 2022. 3
- [3] Zhi-Qi Cheng, Qi Dai, Hong Li, Jingkuan Song, Xiao Wu, and Alexander G Hauptmann. Rethinking spatial invariance of convolutional networks for object counting. In *CVPR*, 2022. 2
- [4] Haroon Idrees, Muhammad Tayyab, Kishan Athrey, Dong Zhang, Somaya Al-Maadeed, Nasir Rajpoot, and Mubarak Shah. Composition loss for counting, density map estimation and localization in dense crowds. In *ECCV*, 2018. 1, 2
- [5] Yuhong Li, Xiaofan Zhang, and Deming Chen. Csrnet: Dilated convolutional neural networks for understanding the highly congested scenes. *CVPR*, 2018. 1, 2
- [6] Dingkang Liang, Wei Xu, and Xiang Bai. An end-to-end transformer model for crowd localization. In *ECCV*, 2022. 2
- [7] Hui Lin, Xiaopeng Hong, Zhiheng Ma, Xing Wei, Yunfeng Qiu, Yaowei Wang, and Yihong Gong. Direct measure matching for crowd counting. *arXiv preprint arXiv:2107.01558*, 2021. 2
- [8] Hui Lin, Zhiheng Ma, Rongrong Ji, Yaowei Wang, and Xiaopeng Hong. Boosting crowd counting via multifaceted attention. In *CVPR*, 2022. 2, 3
- [9] Zhiheng Ma, Xing Wei, Xiaopeng Hong, and Yihong Gong. Bayesian loss for crowd count estimation with point supervision. In *ICCV*, 2019. 2
- [10] Zhiheng Ma, Xing Wei, Xiaopeng Hong, Hui Lin, Yunfeng Qiu, and Yihong Gong. Learning to count via unbalanced optimal transport. In *AAAI*, 2021. 2
- [11] Deepak Babu Sam, Skand Vishwanath Peri, Mukuntha Narayanan Sundararaman, Amogh Kamath, and R Venkatesh Babu. Locate, size, and count: accurately resolving people in dense crowds via detection. *TPAMI*, 2020. 2
- [12] Weibo Shu, Jia Wan, Kay Chen Tan, Sam Kwong, and Antoni B Chan. Crowd counting in the frequency domain. In *CVPR*, 2022. 2
- [13] Vishwanath A Sindagi, Rajeev Yasarla, and Vishal M Patel. Jhu-crowd++: Large-scale crowd counting dataset and a benchmark method. *TPAMI*, 2020. 1, 2
- [14] Jia Wan and Antoni B. Chan. Modeling noisy annotations for crowd counting. In *NIPS*, 2020. 1, 2
- [15] Jia Wan, Ziquan Liu, and Antoni B Chan. A generalized loss function for crowd counting and localization. In *CVPR*, 2021. 2
- [16] Boyu Wang, Huidong Liu, Dimitris Samaras, and Minh Hoai Nguyen. Distribution matching for crowd counting. *NIPS*, 2020. 2
- [17] Qi Wang, Junyu Gao, Wei Lin, and Xuelong Li. Nwpu-crowd: A large-scale benchmark for crowd counting and localization. *TPAMI*, 2020. 1, 2
- [18] Qi Wang, Junyu Gao, Wei Lin, and Yuan Yuan. Learning from synthetic data for crowd counting in the wild. *CVPR*, 2019. 2
- [19] Yingying Zhang, Desen Zhou, Siqin Chen, Shenghua Gao, and Yi Ma. Single-image crowd counting via multi-column convolutional neural network. *CVPR*, 2016. 1, 2
- [20] Yingying Zhang, Desen Zhou, Siqin Chen, Shenghua Gao, and Yi Ma. Single-image crowd counting via multi-column convolutional neural network. In *CVPR*, 2016. 1, 2
